# Supplementary material for: Dioxin-Induced PAI-1 Expression: A Novel Pathway to Pancreatic β-Cell Failure in Type 2 Diabetes
Source: Preprints.org preprint supplement (doi:10.20944/preprints202410.1175.v1), 2024-10-15
Supplement: Supplementary file 1 [file supplementary]

Supplementary Table S1. List of 13 genes annotated as ‘secreted’.

| ENTREZ ID | SYMBOL | GENE NAME | TCDD_1 | TCDD_2 | TCDD_3 | CHIP-seq |
| --- | --- | --- | --- | --- | --- | --- |
| 11806 | Apoa1 | apolipoprotein A-I | -1.55906 | -1.17243 | -5.49471 | None |
| 245050 | Gask1a | golgi associated kinase 1A | -1.16598 | -1.83759 | -6.15324 | None |
| 331535 | Serpina7 | serine (or cysteine) peptidase inhibitor, clade A (alpha-1 antiproteinase, antitrypsin), member 7 | -3.54674 | -2.46288 | -4.04829 | None |
| 16008 | Igfbp2 | insulin-like growth factor binding protein 2 | -1.82908 | -1.22569 | -2.57881 | None |
| 109901 | Cela1 | chymotrypsin-like elastase family, member 1 | -2.20739 | -1.3432 | -1.70639 | None |
| 16625 | Serpina3c | serine (or cysteine) peptidase inhibitor, clade A, member 3C | -2.61836 | -1.44469 | -2.13349 | None |
| 66350 | Pla2g12a | phospholipase A2, group XIIA | 1.716383 | 1.356751 | 2.06774 | AhR |
| 233332 | Adamts17 | a disintegrin-like and metallopeptidase (reprolysin type) with thrombospondin type 1 motif, 17 | 4.256015 | 2.462875 | 3.036405 | AhR |
| 17304 | Mfge8 | milk fat globule EGF and factor V/VIII domain containing | 2.797613 | 2.653158 | 4.503211 | None |
| 29820 | Tnfrsf19 | tumor necrosis factor receptor superfamily, member 19 | 2.590191 | 2.975945 | 2.96406 | AhR |
| 12840 | Col9a2 | collagen, type IX, alpha 2 | 6.053097 | 5.784023 | 11.36311 | AhR |
| 27356 | Insl6 | insulin-like 6 | 6.081238 | 4.725018 | 4.548868 | None |
| 18787 | Serpine1 | serine (or cysteine) peptidase inhibitor, clade E, member 1 | 4.246021 | 5.729618 | 7.784394 | AhR |

These 13 genes were selected among common 103 differentially expressed genes in all three RNA-seq datasets.

Fold changes (FC) are shown as repressed (negative) or induced (positive).

Analysis of CHIPseq dataset (GSE97634) identified AhR-dependent genes (AhR).

TCDD_1, GSE109863, 30 μg/kg TCDD (single exposure) for 7 days

TCDD_2, GSE87519, 3 μg/kg TCDD every 4 days for 28 days (total of 7 exposures)

TCDD_3, GSE87519, 30 μg/kg TCDD every 4 days for 28 days (total of 7 exposures)
